1 Ser/Thr kinase Trc controls neurite outgrowth in *Drosophila* by modulating  
2 microtubule-microtubule sliding.

3 Rosalind Norkett, Urko del Castillo, Wen Lu, Vladimir I. Gelfand

4 Department of Cell and Developmental Biology, Feinberg School of Medicine, Northwestern  
5 University, Chicago, IL 60611, USA

6 [vgelfand@northwestern.edu](mailto:vgelfand@northwestern.edu)

## 7 **Abstract**

8 Correct neuronal development requires tailored neurite outgrowth. Neurite outgrowth is driven  
9 by microtubule sliding – the transport of microtubules along each other. We have recently  
10 demonstrated that a “mitotic” kinesin-6 (Pavarotti in *Drosophila*) effectively inhibits microtubule-  
11 sliding and neurite outgrowth. However, mechanisms of Pavarotti regulation in interphase cells  
12 and specifically in neurite outgrowth are unknown. Here, we use a combination of live imaging  
13 and biochemical methods to show that the inhibition of microtubule sliding by Pavarotti is  
14 controlled by phosphorylation. We identify the Ser/Thr NDR kinase Tricornered (Trc) as a  
15 Pavarotti-dependent regulator of microtubule sliding in neurons. Further, we show that Trc-  
16 mediated phosphorylation of Pavarotti promotes its interaction with 14-3-3 proteins. 14-3-3  
17 binding is necessary for Pavarotti to interact with microtubules and inhibit sliding. Thus, we  
18 propose a pathway by which microtubule sliding can be up or down regulated in neurons to  
19 control neurite outgrowth, and establish parallels between microtubule sliding in mitosis and  
20 post-mitotic neurons.

## 21 **Introduction**

22 In order to communicate, neurons must develop an extensive and precisely regulated network  
23 of axons and dendrites, collectively called neurites. Studying the mechanisms that form these

24 processes is key to understanding early nervous system development. Neurites are filled with  
25 cytoskeletal components including microtubules. Neurons are exceptionally dependent on  
26 microtubules for long range transport of cargo. Also, microtubule organization is essential for  
27 powering initial neurite outgrowth (Kapitein and Hoogenraad, 2015; Lu et al., 2013; Winding et  
28 al., 2016). In order to drive initial neurite outgrowth, microtubules themselves become the cargo  
29 and are transported relative to each other by molecular motors – a process known as  
30 microtubule sliding. Indeed, in cultured *Drosophila* neurons, microtubules can be seen pushing  
31 the plasma membrane at the tips of growing processes (del Castillo et al., 2015; Lu et al., 2013).  
32 Previous work from our group has identified the classical kinesin – Kinesin-1 – as the motor  
33 responsible for the majority of microtubule sliding in neurons (Lu et al., 2013; Winding et al.,  
34 2016).

35 Observation of microtubule sliding in neurons is of particular interest as this process is best  
36 described during vast cytoskeletal reorganization in mitosis, rather than in terminally  
37 differentiated neurons (Baas, 1999). Microtubule sliding is observed in young neurons in culture,  
38 but decreases as neurons mature (Lu et al., 2013). Therefore, in addition to promoting neurite  
39 extension via microtubule sliding, there must also exist mechanisms to downregulate this  
40 process. This prevents overextension of neurites when their intended synaptic targets are  
41 correctly reached. Work from our group and others has previously identified the kinesin-6  
42 Pavarotti/MKLP1 as a powerful inhibitor of microtubule-microtubule sliding. Depletion of  
43 Pavarotti/MKLP1 by RNAi leads to axon hyperextension and more motile microtubules (Del  
44 Castillo et al., 2015; Lin et al., 2012). Identifying a neuronal role for this kinesin was of interest  
45 as Kinesin-6 has well studied roles in mitosis. It exists as a heterotetramer with MgcRacGAP  
46 (Tumbleweed in *Drosophila*) to form the centralspindlin complex (Adams et al., 1998; Basant  
47 and Glotzer, 2018; Mishima et al., 2002). This complex bundles microtubules at the bipolar  
48 spindle in late anaphase (Hutterer et al., 2009). Here, it can locally activate RhoA and promote

49 assembly of the contractile actin ring at the cortex, and so, cytokinesis (Basant and Glotzer,  
50 2018; Verma and Maresca, 2019).

51 How Pavarotti itself is temporally regulated to inhibit microtubule sliding as neurons mature is  
52 unknown. Mitosis exhibits tight temporal regulation. We speculated that similar mechanisms  
53 might be at play in regulating Pavarotti activity in neurons with regard to microtubule sliding.  
54 One well studied facet of centralspindlin regulation in regards to mitotic progression is that of  
55 phosphorylation (Douglas et al., 2010; Guse et al., 2005). Based on bioinformatics and a  
56 literature search, we targeted Ser/Thr kinases known to modify Pavarotti during mitosis and  
57 tested their ability to modulate microtubule sliding in interphase cells. One potential kinase was  
58 the NDR kinase Tricornered (Trc, LATS in mammals) – shown to phosphorylate MKLP1 at S710  
59 (the human ortholog of Pavarotti, S745) *in vitro* (Okamoto et al., 2015) (Fig 1 A). Trc regulates  
60 cell cycle exit (Hergovich et al., 2006) and also has conserved roles in neurite outgrowth,  
61 described in *Drosophila*, *C. elegans* and mammals (Emoto et al., 2006, 2004; Gallegos and  
62 Bargmann, 2004; Ultanir et al., 2012). How this kinase acts warrants further investigation.

63 Here we use *Drosophila* S2 cells, neuronal culture and *in vivo* imaging to show Trc regulates  
64 microtubule sliding and dendrite outgrowth in neurons. We validate Pavarotti as a Trc substrate  
65 and demonstrate that phosphorylation of Pavarotti at S745 by Trc is necessary for proper  
66 control of microtubule sliding. We also show that phosphorylation of Pavarotti affects its  
67 subcellular distribution via interaction with 14-3-3 proteins in interphase cells – a mechanism  
68 conserved from mitosis. We demonstrate the function of this pathway in regulating development  
69 of *Drosophila* neurons.

70

## 71 **Results**

### 72 *Tricornered Kinase inhibits neurite outgrowth and microtubule sliding*

73 We have previously demonstrated the requirement of microtubule-microtubule sliding, by kinesin-  
74 1, for neurite outgrowth in *Drosophila* (Lu et al., 2013; Winding et al., 2016). This sliding is  
75 opposed by the mitotic kinesin-6 'Pavarotti'/MKLP1 (Del Castillo et al., 2015). However, the  
76 mechanism by which Pavarotti itself is regulated in this neuronal context is unclear. We  
77 hypothesized that Pavarotti may be regulated by phosphorylation, as in mitosis (Basant and  
78 Glotzer, 2017; Guse et al., 2005)(Fig 1 A). We targeted kinases known to modify Pavarotti during  
79 mitosis (AuroraB, Plk1 and Trc), and tested their ability to modulate neuronal development and  
80 microtubule sliding in non-dividing cells. Based on preliminary experiments we chose to focus on  
81 the NDR kinase Trc. Initially, we measured sliding using the model system of S2 cells, a  
82 *Drosophila* cell line. We have previously demonstrated that kinesin-1 carried out microtubule-  
83 microtubule sliding in these cells and that Pavarotti inhibits this (Del Castillo et al., 2015; Jolly et  
84 al., 2010). We decreased Trc levels using dsRNA. As shown in Fig 1 D, Trc is depleted and  
85 Pavarotti levels are unaffected. To measure microtubule sliding, we expressed a photoconvertible  
86 tubulin probe (tdEos- $\alpha$ Tubulin84c) in S2 cells. Tubulin was photoconverted in a region of interest,  
87 and this specific population of microtubules was imaged by timelapse confocal microscopy.  
88 Sliding is measured as percentage of photoconverted tubulin outside the original photoconversion  
89 zone – see Methods. We found a significant increase in microtubule sliding upon depletion of Trc  
90 compared to control. (Fig 1 B, quantified in C, video 1).

91

92 Having established that Trc regulates microtubule sliding in S2 cells, we were next interested in  
93 investigating the potential role of Trc in neurite development. We analyzed primary neuronal  
94 cultures from third instar larvae expressing Trc RNAi (neuron specific expression was achieved  
95 by *elav gal4>UAS Trc RNAi*). We found a dramatic increase in total neurite length per cell *in vitro*  
96 (Fig 1 E and F).

97

98 Next, we directly tested the ability of Trc to regulate microtubule sliding in *Drosophila* cultured  
99 neurons. To do this, we expressed the photoconvertible maple tubulin under the control of the  
100 motor neuron specific D42 Gal4 driver and prepared dissociated neuronal cultures from brains of  
101 3<sup>rd</sup> instar larvae (Fig 1 G, video 2). Photoconversion was carried out in a constrained region of the  
102 cell and photoconverted signal was imaged over time to determine microtubule sliding rate, in a  
103 similar fashion to S2 cells. We compared control cells to those expressing Trc RNAi under the  
104 same driver. Consistent with our data in S2 cells, we found that depleting Trc levels led to an  
105 increase in microtubule sliding rate in primary culture (Fig 1 H). Therefore, Trc has the ability to  
106 modulate microtubule sliding in order to control neuronal neurite outgrowth.

107

108 Together, these data describe a role for Trc as a negative regulator of neuronal development,  
109 independent from cell division, and suggest that the mechanism by which Trc regulates neurite  
110 outgrowth is via microtubule sliding. This effect could be intrinsic, rather than dependent on  
111 external cues, as the effect can be seen in dissociated cultures.

112

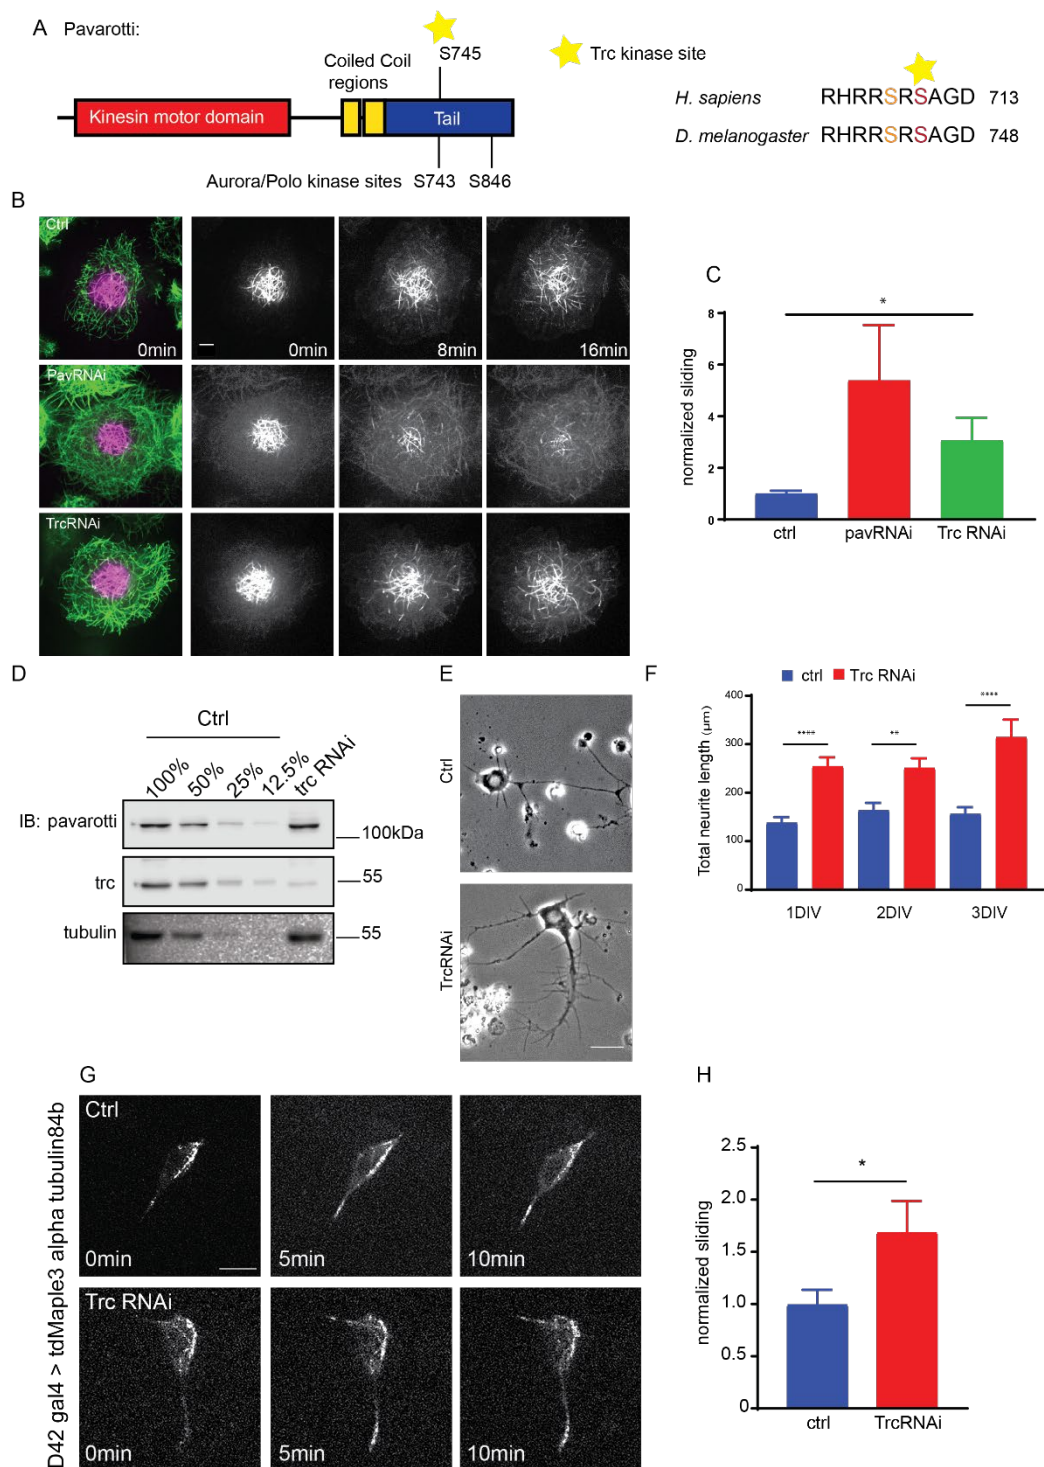

113

114

115

116

**Figure 1. The kinase Trc regulates neurite outgrowth and microtubule sliding**

117

A. Schematic showing domain structure and location of proposed Trc phosphorylation site in *Drosophila* Pavarotti and Human MKLP1. B. Example images of timelapse imaging to measure microtubule sliding in *Drosophila* S2 cells. C. Quantification of microtubule sliding rate shows an increase upon Pavarotti or Trc depletion. D. Western Blot of S2 cell extract showing efficient Trc knockdown. Pavarotti levels are unaffected. E. Representative images of 3<sup>rd</sup> instar larvae cultured neurons under control or *elav>Trc* RNAi conditions. F. Quantification of total neurite length per cell over time in culture. The total neurite length is increased from control upon Trc depletion. 24hrs; ctrl = 137.8 ± 12.0µm, Trc RNAi 254 ± 19.1µm. 48hrs; ctrl = 163.7 ± 15.3µm, Trc RNAi = 251.2 ± 19.9µm, 72hrs; ctrl = 156.3 ± 13.8 µm, TrcRNAi = 314.4 ± 36.5µm. N = 11-23 cells from 3 independent experiments G. Example images from timelapse imaging of photoconverted microtubules in neurons under control conditions or upon Trc depletion. Tubulin was labelled with tdMaple3 alpha tubulin84b. After photoconversion, cells were imaged every minute for 10minutes. Scale bar = 5µm H. Quantification of microtubule sliding rates. Trc depletion leads to an increase in microtubule sliding rates in neurons. Ctrl = 1.0 ± 0.14, TrcRNAi = 1.69 ± 0.30. N = 20 cells from 3 independent experiments. P = 0.04 Student's T-test

126

127

*Trc kinase activity is necessary to control microtubule sliding*

128

We also confirmed that this effect on sliding was dependent upon the kinase activity of Trc in

129

two ways. Firstly, we depleted Furry (Fry) in S2 cells. Furry is a large protein with no known

130

functional domain, shown to promote Trc kinase activity without affecting expression level (Fig 2

131

B) (Emoto et al., 2006). Upon knockdown of Fry, and so decrease in Trc kinase activity, we

132

found an increase in microtubule sliding (Fig 2 B, C, video 3). Secondly, we depleted the

133

endogenous Trc with a dsRNA targeting a non-coding region and expressed either WT Trc,

134

constitutively active Trc (Trc CA), or kinase-dead Trc (Fig 2 D, E, video 4) (He et al., 2005). We

135

confirmed expression of each of these mutants by fluorescence microscopy for BFP-Trc. We

136

found that while WT and constitutively active Trc were able to reduce microtubule sliding to

137

similar levels as control samples, the kinase dead mutant was not. Therefore, Trc negatively

138

regulates sliding in a kinase dependent manner.

139

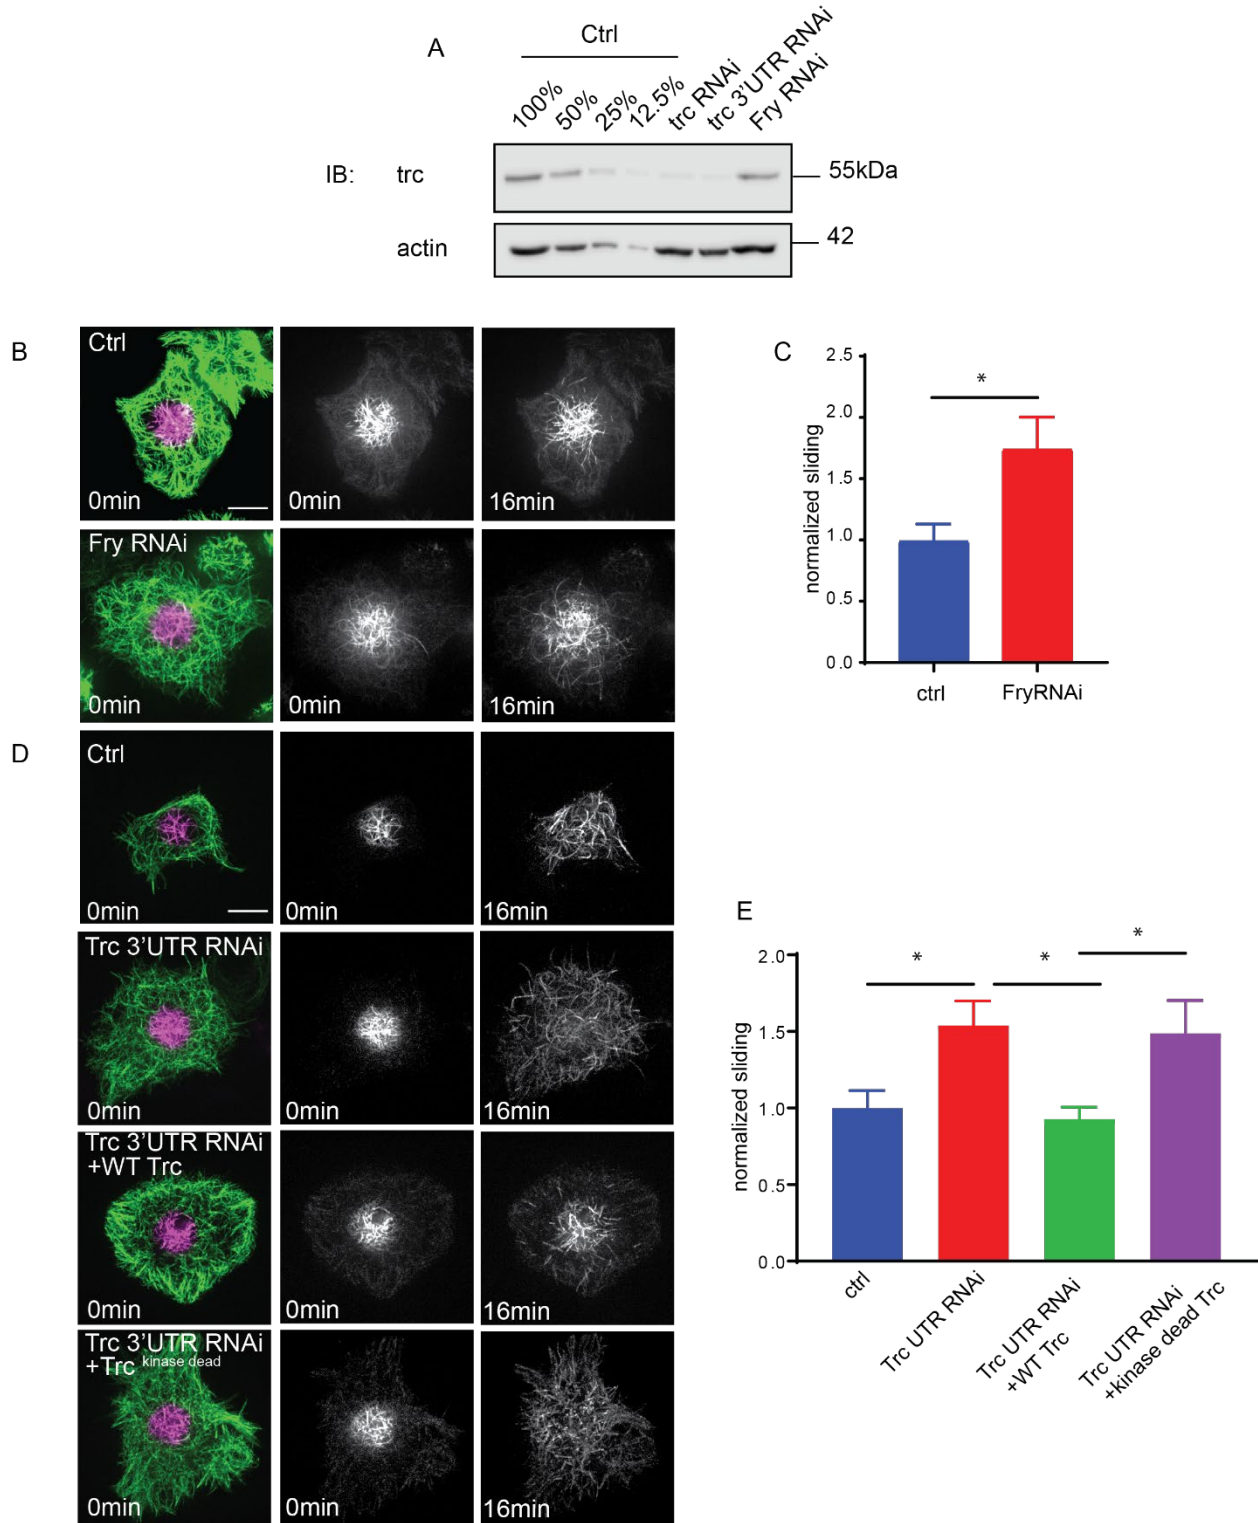

140

141



142  
143  
144  
145  
146  
147  
148  
149  
150  
151  
152  
153  
154  
155  
156  
157  
158  
159  
160  
161  
162  
163  
164  
165

**Figure 2. Trc regulates microtubule sliding in kinase dependent manner.**

A. Western Blot of S2 cell extract showing efficient Trc knockdown with a dsRNA targeting the Trc 3'UTR and dsRNA targeting Fry. Fry knockdown does not affect Trc protein level. Scale bar = 5µm. B. Sliding experiments in S2 cells show increased sliding upon depletion of Fry as quantified in C. n=26-37 cells from 4 independent experiments. Ctrl = 1 ± 0.13, Fry RNAi = 1.75 ± 0.26. Lower 95% CI ctrl = 0.72, Fry RNAi 1.23. Upper 95% CI ctrl = 1.268, Fry RNAi = 2.265. p= 0.024 Student's T-test. D. Sliding experiments in S2 cells show increased sliding upon treatment with Trc 3'UTR dsRNA. This is rescued to control levels with expression of exogenous WT Trc, but not kinase dead Trc. Quantified in E. Scale bar = 5µm. n=46-50 cells from 4 independent experiments. Ctrl=1.0 ± 0.11, Lower 95% CI 0.77, Upper 95% CI 1.23, Trc3'UTR RNAi=1.54 ± 0.16, 1.218, 1.86, Trc3'UTR RNAi + WT Trc = 0.93 ± 0.08, 0.77, 1.09 Trc3'UTR RNAi + kinase dead Trc = 1.49 ± 0.22, 1.05, 1.92. Ctrl vs Trc 3'UTR RNAi p = 0.03, Trc 3'UTR vs 3'UTR + WT p = 0.01, 3'UTR + WT vs 3'UTR kinase dead p = 0.03. One-way Anova with Sidak's post hoc correction.

*Tricornered Kinase phosphorylates Pavarotti to brake microtubule sliding*

Next, we sought to investigate if this effect of Trc was dependent upon Pavarotti. In order to address this, we carried out sliding assays in S2 cells. We overexpressed Trc, either alone, or in conjunction with Pavarotti knockdown. Overexpression of Trc in S2 cells resulted in a decrease in microtubule sliding. This is in good agreement with our previous data describing Trc as a negative regulator of sliding (Fig 3 A, B, video 5). Importantly, upon depletion of Pavarotti, this decrease in sliding was lost (Fig 3 A, B). Therefore, Pavarotti must be present for Trc to oppose microtubule-microtubule sliding. In order to confirm Pavarotti was indeed phosphorylated by Trc at the predicted site S745, we carried out immunoblotting with a phospho-specific antibody for Pavarotti S745. We expressed GFP Pavarotti in HEK 293T cells and performed pull downs with anti GFP antibody. Western blot analysis showed basal phosphorylation at S745. Mutation of Pavarotti Ser745 to Ala gave no signal with the phospho-specific antibody, confirming the antibody specificity. Importantly, ectopic expression of constitutively active Trc (Trc CA), resulted in a roughly twofold increase in Pavarotti phosphorylated at S745. Therefore, Trc phosphorylates Pavarotti at Serine 745 in cells (Fig 3 I).

166 Next, we sought to confirm that phosphorylation at S745 was necessary for Pavarotti to inhibit  
167 microtubule sliding. We once more carried out sliding assays, this time with a knockdown and  
168 rescue approach. Depletion of Pavarotti with a dsRNA against a non-coding region increased  
169 sliding which could be reduced again by expression of wild-type Pavarotti. However, expression  
170 of Pavarotti S745A mutant failed to reduce sliding levels to their control levels (Fig 3 C, D, video  
171 6). Therefore, Pavarotti can no longer inhibit microtubule sliding when phosphorylation of S745 is  
172 prevented.

173 To understand why phosphorylation of Pavarotti is required for sliding inhibition, we compared  
174 microtubule binding of GFP-Pavarotti in S2 cells under control conditions, after Trc depletion, or  
175 after mutation of S745. In order to visualize microtubule-bound Pavarotti, we extracted S2 cells  
176 with Triton X-100 under conditions preserving microtubules (see Materials and Methods). We  
177 found that depletion of Trc led to around a 50% decrease in association of Pavarotti with  
178 microtubules (Fig 3 E, F). Parallel experiments with the phospho-null mutant S745A show the  
179 same effect (Fig 3 G, H). Therefore, Pavarotti in its unphosphorylated state associates less with  
180 microtubules. Under these conditions, microtubule sliding is permitted.

181

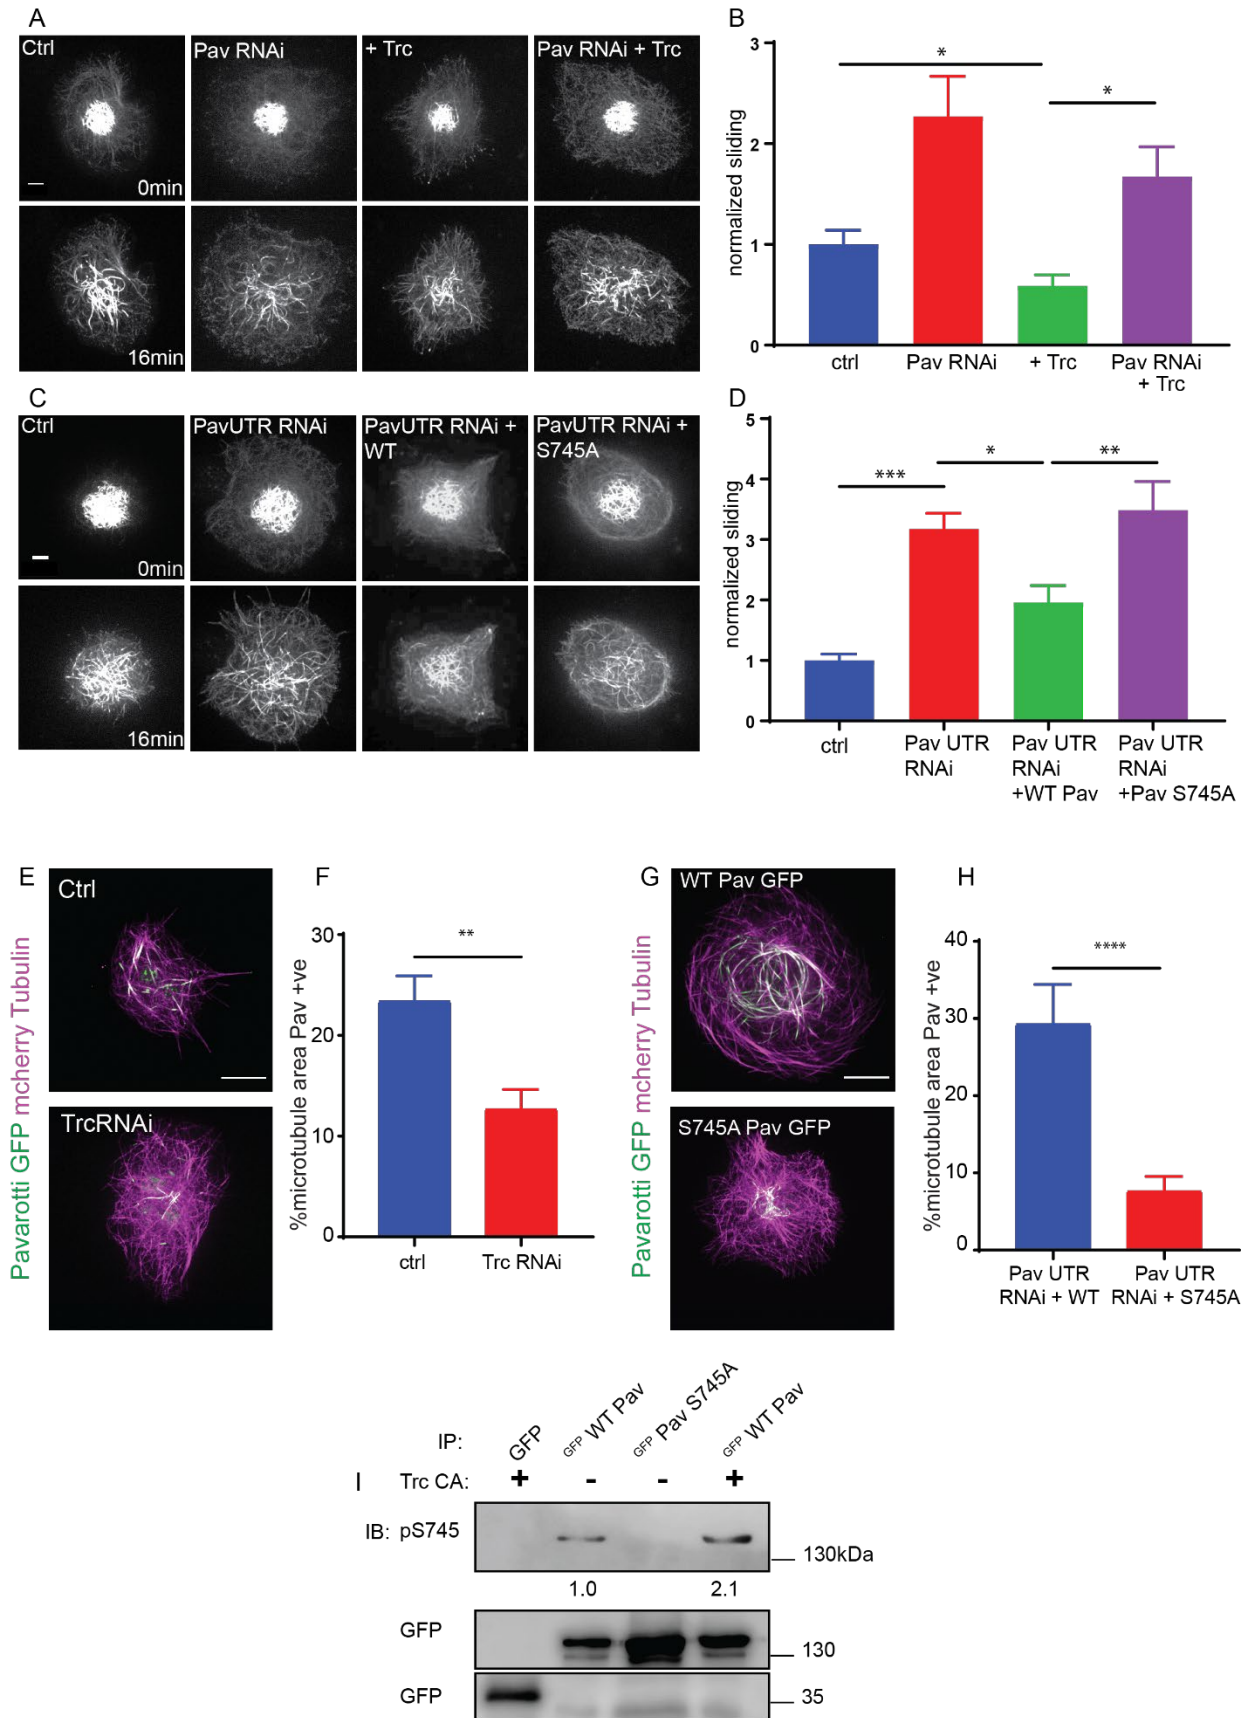

183 **Figure 3. Trc regulates microtubule sliding via phosphorylation of Pavarotti.**  
184 A. Sliding experiments in S2 cells show a decrease in microtubule sliding with Trc  
185 overexpression. Trc overexpression in conjunction with depletion of Pavarotti increases sliding  
186 beyond control levels as quantified in B. Scale bar 5 $\mu$ m C. Sliding experiments in S2 cells show  
187 an increase in microtubule sliding with Pavarotti depletion. The effect can be rescued with WT  
188 Pavarotti but not with Phospho null mutant S745A as quantified in D. n=39-48 cells from 4  
189 independent experiments. Ctrl =  $1 \pm 0.10$  Upper 95% CI = 1.2, Lower 95% CI = 0.79, Pav RNAi =  
190  $3.16 \pm 0.26$ , 2.65, 3.70, Pav RNAi + WT =  $1.96 \pm 0.28$ , 1.40, 2.52 Pav RNAi + Pav S745A =  $3.49$   
191  $\pm 0.48$ , 2.53, 4.44. Ctrl vs Pav RNAi p = 0.0001, Pav RNAi vs pav RNAi + WT p = 0.04, Pav RNAi  
192 vs Pav RNAi + S745A p = 0.94, Pav RNAi + WT vs Pav RNAi + S745A p = 0.0025. One-way  
ANOVA with Sidak's post hoc correction. E. Example images of extracted S2 cells expressing  
mCherry Tubulin and WT Pavarotti GFP under control or Trc RNAi conditions. F Quantification of  
microtubule area colocalized with Pavarotti. n=18-26 cells from 3 independent experiments. Ctrl  
=  $23.5 \pm 2.4\%$ , Upper 95% CI = 28.6, Lower 95% CI = 18.3 Trc RNAi =  $12.78 \pm 1.9\%$ , 16.62,  
8.94. p = 0.001 Student's T-test Scale bar = 10 $\mu$ m. G Example images of extracted S2 cells  
expressing mCherry Tubulin and WT Pavarotti GFP or Pavarotti S745A GFP. Endogenous  
Pavarotti was depleted with dsRNA targeting non coding regions. H Quantification of microtubule  
area colocalized with Pavarotti. n=12-17 cells from 3 independent experiments. Scale bar =  
10 $\mu$ m. WT =  $29.4 \pm 5.0\%$ , Upper 95% CI = 40.4, Lower 95% CI = 18.4, S745A =  $7.79 \pm 1.8\%$ ,  
11.5, 4.08. p = 0.0001 Student's T-test I. Western blot of S745 phospho-Pavarotti from HEK cell  
lysates shows an increase in this species with Trc overexpression.

193 *Inhibition of Microtubule sliding by Pavarotti requires interaction with 14-3-3 proteins*

194  
195 Our data so far show a role for phospho-regulation of Pavarotti in microtubule sliding, beyond its  
196 canonical function in cytokinesis. We chose to continue investigating parallels between mitosis  
197 and interphase/post mitotic microtubule sliding, this time testing the involvement of 14-3-3  
198 proteins. These proteins have been shown to form a complex with Pavarotti dependent upon  
199 phosphorylation at the identified S745 site (Douglas et al., 2010; Fesquet et al., 2015). This  
200 association influences microtubule bundling (Douglas et al., 2010). We chose to further probe this  
201 mechanism, both with regards to Pavarotti S745 phosphorylation by Trc and microtubule sliding.  
202 Initially we carried out co-immunoprecipitation experiments of exogenous GFP-Pavarotti from  
203 HEK-293 FT cells. We found a robust interaction between WT Pavarotti and endogenous 14-3-3  
204  $\xi$ . Mutation of S745 to alanine, mimicking a non-phosphorylated form of Pavarotti, abrogated the  
205 interaction. Co-expression of exogenous Trc, generating a greater pool of phosphorylated  
206 Pavarotti at S745 (Fig 4 A), increases the interaction between Pavarotti and 14-3-3  $\xi$ . Therefore,

207 we confirm that phosphorylation of Pavarotti, by Trc, is indeed functioning to recruit 14-3-3  
208 proteins.

209 We next tested if the interaction between Pavarotti and 14-3-3s is necessary for microtubule  
210 sliding inhibition by Pavarotti in S2 cells. We depleted *Drosophila* 14-3-3  $\beta$  and  $\xi$  isoforms in S2  
211 cells by dsRNA and overexpressed Pavarotti. Knockdown is demonstrated by western blot in Fig  
212 4 F. Overexpression of Pavarotti caused a decrease in microtubule sliding. However, when we  
213 depleted 14-3-3 levels, we no longer observed this decrease in sliding upon Pavarotti  
214 overexpression (Fig 4 B, quantified in C, video 7). Thus, Pavarotti is not capable of inhibiting  
215 microtubule sliding in the absence of 14-3-3 proteins. These data are in good agreement with  
216 microtubule sliding assays performed with our S745A mutant, where a complex between Pavarotti  
217 and 14-3-3s does not form. Observation of the microtubule network in this condition showed a  
218 decrease in Pavarotti associated with microtubules (Fig 4 D, E), consistent with the effect seen  
219 with Trc depletion or the S745A mutation. Altogether, our data suggest Pavarotti locally brakes  
220 microtubule sliding by forming a complex with 14-3-3 proteins. The formation of this complex  
221 requires on phosphorylation at S745, by the kinase Trc.

222

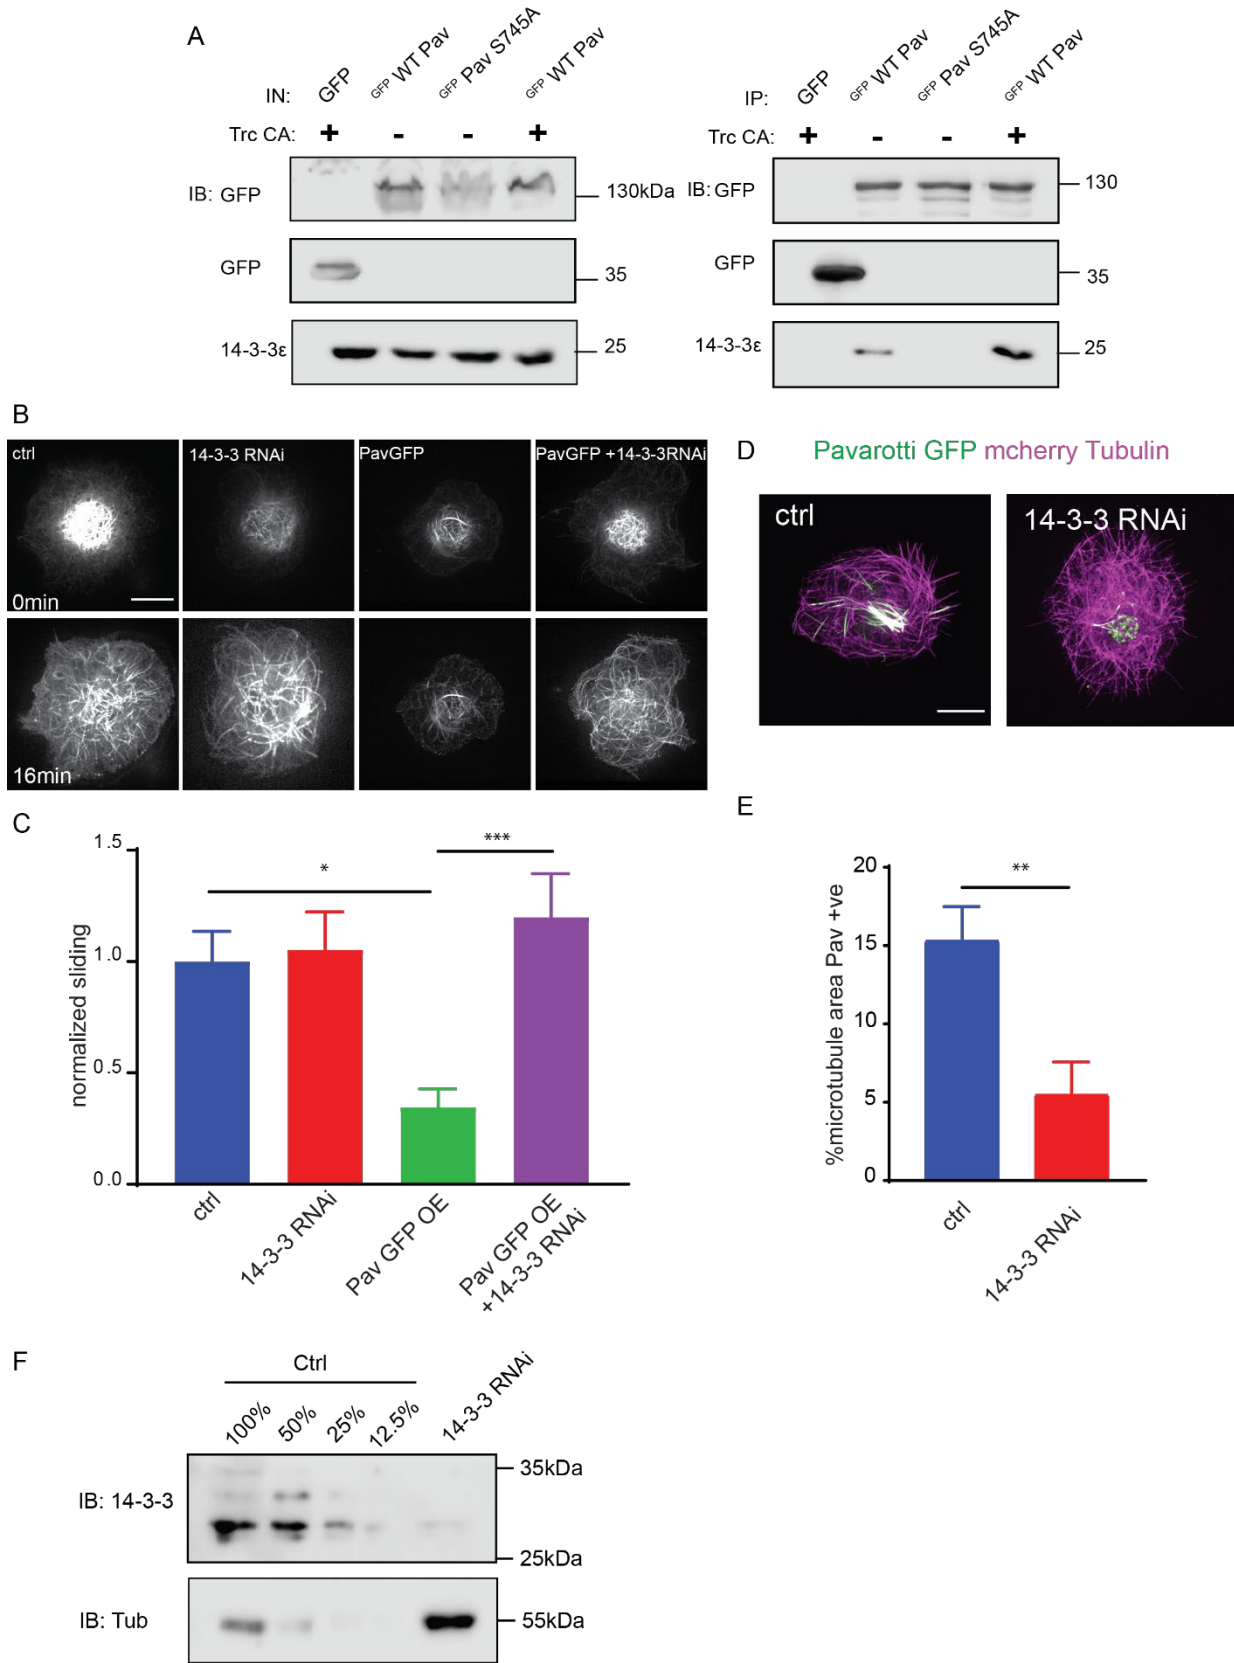

223

224

225 **Figure 4. Phospho-Pavarotti brakes microtubule sliding via interaction with 14-3-3**  
226 **proteins.**  
227 A. Western blot from HEK cell lysate showing co immunoprecipitation of Pavarotti and 14-3-3.  
228 The interaction is lost upon mutation of S745 to Alanine and increased upon co-expression of  
229 the kinase Trc. B. Sliding experiments in S2 cells show the ability of Pavarotti to brake  
230 microtubule sliding is dependent upon 14-3-3 proteins as quantified in C. Scale bar = 10 $\mu$ m.  
231 n=21-26 cells from 3 independent experiments. Ctrl=  $1 \pm 0.14$  Upper 95% CI = 1.28, Lower 95%  
232 CI = 0.72, PavOE=  $0.35 \pm 0.08$ , 0.52, 0.18 14-3-3 RNAi=  $1.05 \pm 0.17$ , 1.41, 0.70, 14-3-3RNAi +  
233 PavOE =  $1.20 \pm 0.20$ , 1.6, 0.8. ctrl vs pav OE p = 0.01, ctrl vs 1433RNAi p = 0.99, ctrl vs 1433  
234 RNAi + PavOE p = 0.78, Pav OE vs 1433 RNAi p = 0.007, pav OE vs 1433 RNAi + Pav OE p =  
235 0.0004, 1433 RNAi vs 1433 RNAi + Pav OE p = 0.91 One-way ANOVA with Tukey's post hoc  
236 correction. D Example images of extracted S2 cells expressing mCherry Tubulin and WT  
237 Pavarotti GFP. Depletion of 14-3-3s decreases microtubule area decorated with Pavarotti. Scale  
238 bar = 10 $\mu$ m E. Quantification of microtubule area colocalized with Pavarotti. n=22-26 cells from 3  
239 independent experiments. Ctrl =  $15.4 \pm 2.1$ , Upper 95% CI = 19.72, Lower 95% CI = 11.07, 14-  
240 3-3 RNAi =  $5.54 \pm 2.0$ , 9.78, 1.30. p = 0.0017 Student's T-test. F. Western blot from S2 cell  
241 lysate demonstrating knockdown of 14-3-3.

233 *Pavarotti and Trc act in the same pathway to control dendrite outgrowth in vivo*

234 We hypothesized that Trc and Pavarotti are in the same pathway in *Drosophila* neurons *in vivo*  
235 and regulate neurite outgrowth together. In order to test this, we measured the dendritic arbor of  
236 class IV DA (dendritic arborization) neurons (sensory neurons) in 3<sup>rd</sup> instar larvae either upon  
237 knockdown of Trc, Pavarotti, or both in conjunction. Class IV neurons were labelled with  
238 ppk::tdTomato and neuron specific expression of RNAis was achieved with elav gal4. In each  
239 case, we observed a roughly 40% increase in total dendrite length (Fig. 5 A, B). In the case of  
240 Trc, these data are consistent with previous reports (Emoto et al., 2004) where expression was  
241 abolished by mutation rather than neuron specific RNAi. Notably, the effect upon double  
242 knockdown was equivalent to that of the single knockdowns (Fig. 5 A, B). This supports the  
243 hypothesis that Trc and Pavarotti regulate neurite outgrowth in concert. Taken together, these  
244 data demonstrate the requirement for Pavarotti phosphorylation at S745 by Trc to brake  
245 microtubule sliding and correctly tailor neurite extension. Also, we show how Trc regulates  
246 microtubule sliding by influencing Pavarotti-microtubule binding.

247

A

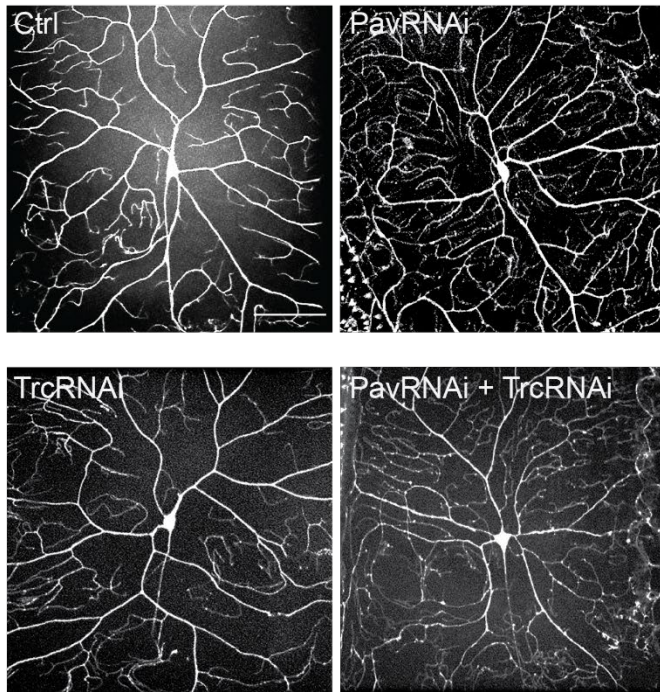

B

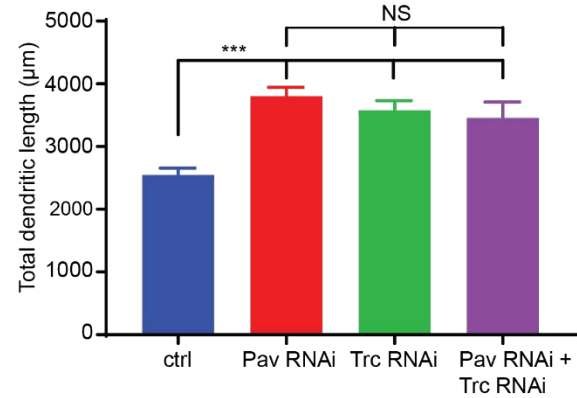

248

249

250 **Figure 5. Pavarotti and Trc act in the same pathway to control dendrite outgrowth *in vivo***

251 A. Example images showing DA neurons labelled with ppk::tdTomato in 3<sup>rd</sup> instar larvae under  
252 control conditions, with Pavarotti or Trc RNAi driven by elavGal4, or both RNAis together. Scale  
253 bar = 50µm. n=15-30 cells from at least 4 animals. Ctrl = 2549 ± 108µm, Upper 95% CI = 2771,  
254 Lower 95% CI = 2328, Pav RNAi = 3803 ± 141µm, 4099, 3507, Trc RNAi = 3577 ± 155µm, 3904,  
3250, Pav and Trc RNAi = 3455 ± 257µm, 4005, 2905. B. Pavarotti and Trc depletion cause an  
increase in dendritic length compared to control. Depletion of both proteins together has a non-  
additive effect compared with either RNAi. Ctrl vs Pav RNAi p < 0.0001, Ctrl vs Trc RNAi, p <  
0.0001, Ctrl vs double RNAi p = 0.0006, PavRNAi vs Trc RNAi p = 0.76, Pav RNAi vs double  
RNAi p = 0.48, Trc RNAi vs Double RNAi p = 0.96. One-way ANOVA with Tukey's post hoc  
correction.

255

256

257



258 **Discussion**

259

260 Developing neurons must extend neurites to form a network for correct communication. This  
261 outgrowth must be downregulated as the neurites reach their intended targets and form stable  
262 synapses. We have previously shown that microtubule-microtubule sliding is required for neurite  
263 outgrowth in young neurons and is diminished in mature neurons by the action of *Drosophila*  
264 kinesin-6, Pavarotti. However, the processes by which Pavarotti might temporally regulate  
265 microtubule sliding were unknown. Here we report an inhibitory pathway for microtubule sliding.  
266 Our previous work has demonstrated roles for “mitotic” processes (microtubule-microtubule  
267 sliding) and “mitotic” motors (kinesin-6 Pavarotti) in regulating the neuronal cytoskeleton. In this  
268 study, we extended these parallels to identify the NDR kinase Trc (Tricornered) as a required  
269 component of the Pavarotti pathway, regulating neurite outgrowth.

270 *Trc is a novel regulator of microtubule sliding*

271 NDR kinases have well studied roles in cell division and tissue morphogenesis. The yeast  
272 homologue of Trc (Dbf2p) promotes chromosome segregation and mitotic exit. These functions  
273 are conserved in mammals (Hergovich et al., 2006; Tamaskovic et al., 2003). However,  
274 neuronal expression of some NDR kinases has additionally been reported. In neurons, depletion  
275 of Trc has been linked to increased outgrowth of both axons and dendrites across multiple taxa  
276 (Emoto et al., 2004; Gallegos and Bargmann, 2004; Ultanir et al., 2012; Zallen et al., 1999). Our  
277 data are in good agreement with these previous reports as we measure an increase in neurite  
278 length *in vitro* and an increase in dendrite length *in vivo*. Further, our data uncover a mechanism  
279 for this increased outgrowth. Depletion of Trc leads to increased microtubule sliding in both S2  
280 cells and in cultured primary neurons. This increased sliding allows microtubules to push at the  
281 tips of nascent neurites, providing the force required for their extension (del Castillo et al., 2015;  
282 Lu et al., 2013). Indeed, this sliding has been shown to translate into dendrite outgrowth *in vivo*

283 – expression of a sliding deficient kinesin-1 mutant drastically decreases the dendritic arbores of  
284 *Drosophila* sensory neurons (Class IV DA neurons) (Winding et al., 2016).

285 *Trc Phosphorylates Pavarotti to brake microtubule sliding*

286 Similarly to Trc, the kinesin-6 Pavarotti was thoroughly studied with regard to cell division. It is a  
287 microtubule cross linker and signalling hub to promote cleavage furrow ingress (Adams et al.,  
288 1998; Basant and Glotzer, 2017; Verma and Maresca, 2019). Moreover, Pavarotti's ability to  
289 localize to the spindle is dependent on its phosphorylation state (Guse et al., 2005). Here we  
290 have shown that Pavarotti is a downstream effector of Trc in the sliding inhibition pathway – Trc  
291 overexpression could only decrease sliding in the presence of Pavarotti. Using a similar  
292 approach, we have also demonstrated that Trc's ability to regulate microtubule sliding is  
293 dependent upon its kinase activity. Knockdown and rescue experiments in S2 cells showed wild  
294 type and constitutively active Trc constructs could restore normal sliding levels but, a kinase  
295 dead variant was unable to do this. Further we have used a phospho-null mutant to demonstrate  
296 that phosphorylation of Pavarotti at the proposed Trc site of Serine 745 is necessary to inhibit  
297 sliding. Importantly, we confirm biochemically that *Drosophila* Pavarotti is phosphorylated at this  
298 site by Trc *in situ*. This extends previous reports to show this pathway is conserved between  
299 humans and *Drosophila* (Fesquet et al., 2015). *In vivo*, we demonstrate that these two proteins  
300 genetically interact to regulate neuronal development. Depletion of either Trc or Pavarotti leads  
301 to increased dendrite length in class IV DA neurons. Depletion of both of these proteins  
302 simultaneously has no additive effect, therefore these proteins act in a common pathway.  
303 Notably, this is the first report of Pavarotti regulating dendrite development in *Drosophila*.  
304 Previous work has shown Pavarotti prevents axon overgrowth (Del Castillo et al., 2015) and  
305 reports in mammalian systems have suggested roles in both compartments (Lin et al., 2012).

306 Whilst protein translation presents a clear alternative in regulating protein activity, we favour a  
307 phosphorylation model. Pavarotti expression is inhibited by Toll-6-FoxO signalling and Toll-6-

308 FoxO mutants have increased microtubule stability (McLaughlin et al., 2016). However,  
309 phosphorylation would provide more dynamic method for modulating Pavarotti. Moreover,  
310 phosphorylation would provide tighter spatial regulation which could be necessary in inhibiting  
311 sliding in primary neurites while secondary processes are still developing. It is possible that  
312 Pavarotti phosphorylation inhibits kinesin-1 mediated microtubule sliding initially, and is  
313 subsequently regulated at the protein translational level.

314 *Phospho-Pavarotti forms a complex with 14-3-3 proteins to brake microtubule sliding*

315 Extending our hypothesis that mitotic mechanisms regulating Pavarotti may be prevalent in  
316 neurons, we chose to investigate the role of 14-3-3s in microtubule sliding. 14-3-3s are  
317 conserved acidic proteins which bind phospho-threonine and phospho-serine residues (Cornell  
318 and Toyo-oka, 2017). Interaction and complex formation with phosphorylated proteins to  
319 facilitate cytoskeleton remodelling and axon extension has been described multiple times  
320 (Cornell and Toyo-oka, 2017; Taya et al., 2007). In *C. elegans* in mitosis, 14-3-3s have been  
321 shown to bind to the centralspindlin complex when Zen-4 (the *C. elegans* orthologue of  
322 Pavarotti/MKLP1) is phosphorylated at S710 (equivalent of Pavarotti S745) (Douglas et al.,  
323 2010). Here we show by co-immunoprecipitation experiments that Trc mediated phosphorylation  
324 at this site promotes formation of a complex between Pavarotti and 14-3-3s, in good agreement  
325 with previous data (Fesquet et al., 2015). This complex has previously been proposed to  
326 prevent stable microtubule binding *in vitro*. Interestingly, our data in S2 cells suggest the  
327 opposite. Examining the subcellular distribution of Pavarotti showed clear differences in  
328 microtubule association based on Trc-mediated phosphorylation state, and so, 14-3-3  
329 interaction. We found Pavarotti localized more robustly to microtubules in the presence of Trc  
330 and that the phospho null mutant had a decreased ability to associate with microtubules. Upon  
331 association with microtubules, Pavarotti acts as a crosslinker and inhibits microtubule sliding.  
332 These observations are consistent with our sliding data – preventing Pavarotti phosphorylation

333 by Trc upregulated microtubule sliding. Based on our findings, we suggest this phosphorylation  
334 promotes interaction with 14-3-3s, which in turn promotes microtubule localization. Indeed, our  
335 data show that 14-3-3s are necessary for Pavarotti to brake microtubule sliding.

336

337

338

339

340

341

342

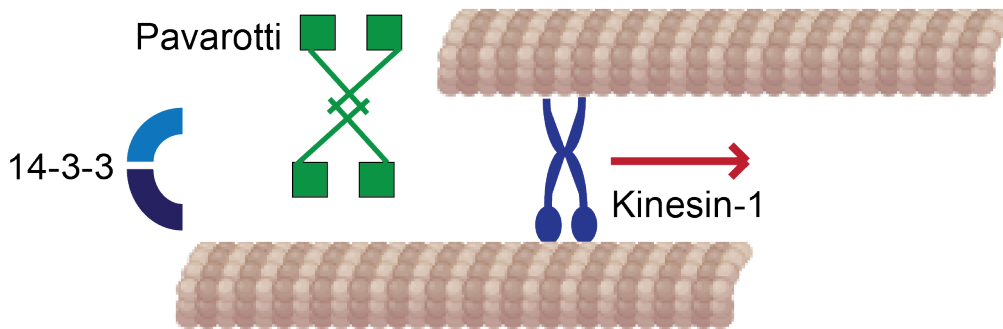

343

344

345

346

347

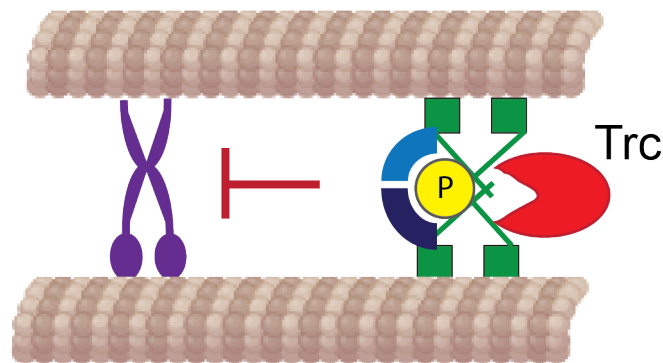

348

**Summary of results.** Kinesin-1 slides microtubules along one another to facilitate neurite outgrowth. The kinase Trc inhibits this process by phosphorylation of Pavarotti. Phosphorylated Pavarotti forms a complex with 14-3-3 proteins and associates with microtubules. Under these conditions, microtubules are cross-linked and can no longer undergo sliding by kinesin-1. Therefore, neurite outgrowth is inhibited.

349 Here we present a microtubule-based mechanism for Trc and Pavarotti controlling neurite  
350 development and show how the kinase Trc directs Pavarotti intracellular localization. Beyond  
351 this, it would be of interest to investigate a concurrent role for actin remodelling in process  
352 outgrowth. Pavarotti is a component of the centralspindlin complex (Mishima et al., 2002). The  
353 other component, tumbleweed/MgcRacGAP, gives an axon overextension phenotype upon  
354 depletion, like Pavarotti (Goldstein et al., 2005) and the expression levels of each are  
355 dependent on the other (Del Castillo et al., 2015). MgcRacGAP is a major orchestrator of RhoA  
356 signalling via Pebble/RhoGEF (Basant and Glotzer, 2018). This RhoGEF promotes formation of  
357 the cytokinetic furrow via actin assembly. Further, Trc has been proposed to inhibit Rac activity  
358 in a kinase dependent manner (Emoto et al., 2004). It has recently been demonstrated that the  
359 centralspindlin complex acts as a signalling hub to spatially and temporally regulate contraction  
360 of the actin cortex (Verma and Maresca, 2019). Might these signalling pathways be acting in  
361 developing neurites to tailor their development in addition to mechanical regulation via  
362 microtubule sliding?

363 The data presented here raise new questions beyond regulating microtubule sliding regulation.  
364 These data along with previous work from our group and others show a role for Pavarotti in  
365 controlling both axon and dendrite outgrowth (Del Castillo et al., 2015; Lin et al., 2012). This is  
366 consistent with our findings that kinesin-1 mediated microtubule sliding is necessary for proper  
367 development of both these compartments (Winding et al., 2016). Further, does microtubule  
368 sliding play a role in specifying axon formation? A crucial and distinctive feature of axons and  
369 dendrites is that of their microtubule polarity – axonal microtubules have a uniform, plus end out  
370 microtubule orientation, whereas dendritic microtubules are of mixed polarity or uniformly minus  
371 ends out (Baas et al., 1988; Stone et al., 2008). Kinesin-6 has been previously proposed to  
372 confer dendritic identity via transport of minus ends distal microtubules into dendrites and away  
373 from axons (Lin et al., 2012; Yu et al., 2000). Does the regulation of microtubule sliding via

374 Pavarotti/kinesin-6 phosphorylation contribute to the microtubule polarity of nascent processes?

375 How might these regulatory processes change over the course of axonal and dendritic

376 development?

377 As well as neurite initiation, microtubule sliding occurs during axon regeneration (Lu et al.,

378 2015). After axon or dendrite severing, *in vitro* or *in vivo*, large scale rearrangements of the

379 microtubule cytoskeleton are observed (Lu et al., 2015; Stone et al., 2010). This is in contrast to

380 in mature neurons where sliding is silenced. In this case, it could be of great interest to exploit

381 our suggested mechanism of Pavarotti phosphorylation. Notably the kinase Trc may be a

382 promising candidate for chemical inhibition. Would chemical inhibition or silencing of the kinase

383 Trc deplete the pool of phospho-Pav and prolong the time period during which microtubule

384 sliding was upregulated? Could this, in turn, facilitate neurite regeneration after injury? Further

385 work will be required to address any potential for modulating Trc activity in neuronal

386 regeneration.

387

388

389

390

391

392

393

394

395 **Materials and Methods**

396 Fly stocks

397 Flies were maintained at room temperature (24~25 C) on regular cornmeal food (Nutri-Fly,  
 398 Bloomington Formulation), supplemented with dry active yeast. Stocks used in this study were:  
 399 *w*; *elav-Gal4* (III, a kind gift from C. Doe), *yw*; *wg<sup>(Sp)</sup>/CyO*; *Dr<sup>(Mio)</sup>/TM3*, *Sb* (a kind gift from E.  
 400 Ferguson), *yw*; *ppk-CD4-tdtomato* (II, BDSC stock 35844), *w*; *D42-Gal4* (III, BDSC stock  
 401 8816)(Pilling et al., 2006) *y sc v*; *UAS-Trc-RNAi* (TRiP.GL00028 and, TRiP.GL01127, attP2,  
 402 BDSC stocks 35160 and 41591), *y sc v*; *UAS-Pav- RNAi* (TRiP.HMJ02232, attP40, BDSC stock  
 403 42573), *w*; *UASp-tdMaple3-alpha tubulin 84B* has been previously described (Lu et al., 2016).  
 404 An insertion on the second chromosome was used to generate *yw*; *UASp-tdMaple3-alpha*  
 405 *tubulin 84B*; *UASp-Trc RNAi* (TRiP.GL01127, attP2)

406

407 Constructs and dsRNA generation

408 dsRNAs were generated using the sequences described below with the T7 sequence

409 TAATACGACTCACTATAGGG at the 5' end.

|                      |                             |                      |                              |
|----------------------|-----------------------------|----------------------|------------------------------|
| Trc fwd              | GCTTGAAGGTTGCCGCACTTT<br>GC | Trc rev              | GGGTATTTGCTGCTGCCCAATA<br>AG |
| Trc 3'<br>UTR<br>fwd | GGTTGCCGCACTTTGCCACCC       | Trc 3'<br>UTR<br>rev | GCGTTTAACCTAGCCCGAGGCG       |
| Pavarot<br>ti fwd    | AAATCCGTAACGAACTAACCG       | Pavarot<br>ti rev    | ACAACTGCTCTTGGCAGATACC       |

|                     |                                |                     |                                     |
|---------------------|--------------------------------|---------------------|-------------------------------------|
| Pavarotti 3'UTR fwd | AAATGACTCAGCGTGGAATTCT<br>C    | Pavarotti 3'UTR rev | CAGTATATGCGCGTAATTCACCTT<br>TAT     |
| Pavarotti 5'UTR fwd | TCGGTCACTCTAAAACCAAGCG<br>TG   | Pavarotti 5'UTR rev | TCGGTCACTCTAAAACCAAGCGT<br>G        |
| Fry fwd             | GCCCAGAACGGTGCCAGTCC           | Fry rev             | CCGTGCACGACATCCTGACGCC              |
| 14-3-3 epsilon fwd  | GGTGGAGGCCATGAAGAAG<br>GTCGC   | 14-3-3 epsilon rev  | CGGATGGGGTGTGTTGGTGG                |
| 14-3-3 zeta fwd     | CTGGACACACTGAACGAGG<br>ACTCCTA | 14-3-3 zeta rev     | CATTTGCTTAGTTGTTTGGTTA<br>GTTGTCGCC |

410

411 Constructs used in this study are: pMT EOS tubulin (described in (Barlan et al., 2013)). WT,  
 412 T253E (constitutively active) and K122A (kinase dead) Trc constructs were a kind gift from P.  
 413 Adler and were cloned from pUAS<sub>t</sub> into pMT-BFP using EcoRI and NotI restriction sites. pMT  
 414 GFP Pavarotti was generated from pMT-BFP Pavarotti, previously described in (Del Castillo et  
 415 al., 2015). The phospho null mutant S745A was generated by site directed mutagenesis. For  
 416 mammalian expression, Pavarotti constructs were subcloned in to pEGFP-C1 using EcoRI and  
 417 Sall. Trc T253E was subcloned into pcDNA 3.1+ using HindIII and NotI. pMT-mcherry Tubulin  
 418 has been previously described (Del Castillo et al., 2015).

419 Cell culture

420 *Drosophila* S2 cells were maintained in Insect-Xpress medium (Lonza) at 25°C. Transfections  
 421 were carried out with Effectene (Qiagen) according to the manufacturer's instructions. dsRNA



422 was added to cells on days 1 and 3 and imaging was carried out on day 5. HEK 293 FT cells  
423 were maintained in DMEM (Sigma Aldrich) supplemented with Penicillin Streptomycin and 10%  
424 FBS at 37°C and 5% CO<sub>2</sub>. HEK cells were transfected by Calcium Phosphate precipitation with  
425 5µg DNA.

426 Primary neuronal cultures were prepared by dissection of brains from 3<sup>rd</sup> instar larvae and  
427 dissociation of tissue using liberase (Roche). Cells were plated on ConA coated glass coverslips  
428 and maintained in Schneiders medium supplemented with 20% FBS, 5µg/ml insulin, 100µg/ml  
429 Pen-Strep, 50µg/ml Gentamycin and 10µg/ml Tetracycline. For sliding assays, larvae were  
430 cultured at 29°C and imaged 1hr after plating.

#### 431 Immunoprecipitation and western blotting

432 Co-Immunoprecipitation from HEK 293 cells was carried out in coIP buffer (50mM Tris pH 7.5,  
433 150mM NaCl, 1.5% Triton X-100, 1mM EDTA, 1mM PMSF, 20µg/ml Chymostatin, Leupeptin,  
434 Pepstatin, 1mM NaVO<sub>3</sub>). For phosphorylation experiments, GFP-Pavarotti was enriched by GFP  
435 pull down in RIPA buffer (50 mM Tris pH 7.4, 150 mM NaCl, 1% Triton, 0.5% Na-Deoxycholate,  
436 0.1% SDS, 1.5 mM NaVO<sub>3</sub>, 1 mM PMSF, 20µg/ml Chymostatin, Leupeptin, Pepstatin, 1mM  
437 NaVO<sub>3</sub>). Cells were lysed, debris was pelleted by centrifugation, and the soluble fraction was  
438 incubated with single chain anti GFP antibody (GFP-binder) (GFP-Trap-M; Chromotek)  
439 conjugated to sepharose beads. Samples were washed 3x in lysis buffer and boiled in 5x  
440 laemmli buffer prior to loading on 10% acrylamide gels for electrophoresis. To assess efficient  
441 knockdown of proteins, S2 cells were lysed directly in sample buffer and boiled. After  
442 electrophoresis, transfer onto nitrocellulose membrane was carried out and blocking was  
443 performed in 4% milk in PBS-T. For phospho- specific antibody, blocking was carried out with  
444 3% BSA in TBS-T. Antibodies used were: Anti-Trc (a kind gift from K. Emoto), anti-Pavarotti (a  
445 kind gift from J. Scholey), anti-Tubulin DM1a, Anti-Pavarotti pS710 (corresponding to *Drosophila*  
446 S745) was a kind gift from M. Mishima, anti GFP was prepared in house. HRP conjugated

447 mouse and rabbit secondary antibodies were from Jackson. Western blotting was performed  
448 using advansta western bright quantum substrate and Licor Imagequant system.

#### 449 Fixed imaging

450 For subcellular localization analysis of Pavarotti, S2 cells were plated on ConA coated  
451 coverslips and allowed to attach. Cells were then extracted in 30% glycerol, 1%triton, 1uM taxol  
452 in BRB80 for 3 minutes and imaged directly.

#### 453 Microscopy and photoconversion

454 To image dissociated neuronal cultures by phase contrast we used an inverted microscope  
455 (Eclipse U2000; Nikon Instruments) equipped with 60x/ 1.40-N.A objective and a CoolSnap ES  
456 CCD camera (Roper Scientific) and driven by Nikon Elements software.

457 To image *Drosophila* S2 cells and primary neurons, a Nikon Eclipse U200 inverted microscope  
458 with a Yokogawa CSU10 spinning disk confocal head, Nikon Perfect Focus system, and  
459 100x/1.45-N.A. objective was used. Images were acquired with an Evolve EMCCD  
460 (Photometrics) using Nikon NIS-Elements software (AR 4.00.07 64-bit). S2 cells expressing  
461 tdEOS-tagged Tubulin were plated in Xpress with 2.5 $\mu$ M cytoD and 40nM taxol. For  
462 photoconversion of tdEOS-tagged Tubulin in sliding assays we applied 405-nm light from a  
463 light-emitting diode light source (89 North Heliophor) for 5s. The 405nm light was constrained to  
464 a small circle with an adjustable diaphragm, therefore only a region of interest within the cell  
465 was photoconverted. After photoconversion, images were collected every minute for >10 min.

#### 466 Microtubule sliding analysis

467 Analysis was carried out as previously described. Briefly, time-lapse movies of photoconverted  
468 microtubules were bleach-corrected and thresholded and the initial photoconverted zone was  
469 identified. The number of pixels corresponding to MTs was measured in total or outside the

470 initial zone for each frame. The motile fraction (defined as  $MTs_{\text{outside\_initial\_zone}}/MTs_{\text{total}}$ ) was plotted  
471 against time and the slope of the linear portion was calculated to represent microtubule sliding  
472 rate. For analysis of microtubule sliding in neurons, images were bleach corrected and denoised  
473 using despeckle in FIJI. Movies were then processed using the WEKA trainable segmenter in  
474 Fiji to generate probability maps of photoconverted microtubules (Arganda-Carreras et al.,  
475 2017). Probability maps were thresholded and analyzed in the same way as S2 cells.

476 Statistical analysis and data presentation

477 Data are presented as mean  $\pm$  standard error. Statistical analysis was carried out in GraphPad.  
478 Data were analyzed using student's T-test or One-way ANOVA with Sidak's post hoc correction  
479 for multiple comparisons. Data are collected from at least 3 replicates. Statistical significance is  
480 presented as \*  $p < 0.05$ , \*\*  $p < 0.01$ , \*\*\*  $p < 0.001$ . Data in figure legends are presented as mean  $\pm$   
481 standard error, Upper 95% Confidence Interval, Lower 95% Confidence interval.

## 482 **Acknowledgements**

483 This work was supported by NIH R01 GM052111 to V. Gelfand. We thank members of the  
484 Gelfand lab and M. Glotzer for helpful discussion. We thank the Bloomington Stock Center (NIH  
485 P40OD018537) for fly stocks. We thank M. Mishima for phospho specific Pavarotti antibodies,  
486 K. Emoto for Trc antibody and we thank P. Adler for Trc DNA constructs. We thank M. Winding  
487 for initial observations regarding 14-3-3 and microtubule sliding.

488 **Competing interests:** the authors declare no competing interests.

489

## 490 **References**

- 491 Adams RR, Tavares AA, Salzberg A, Bellen HJ, Glover DM. 1998. pavarotti encodes a kinesin-  
492 like protein required to organize the central spindle and contractile ring for cytokinesis.  
493 *Genes Dev* **12**:1483–1494. doi:10.1101/gad.12.10.1483
- 494 Arganda-Carreras I, Kaynig V, Rueden C, Eliceiri KW, Schindelin J, Cardona A, Sebastian  
495 Seung H. 2017. Trainable Weka Segmentation: a machine learning tool for microscopy  
496 pixel classification. *Bioinformatics* **33**:2424–2426. doi:10.1093/bioinformatics/btx180
- 497 Baas PW. 1999. Microtubules and Neuronal Polarity: Lessons from Mitosis. *Neuron* **22**:23–31.  
498 doi:10.1016/S0896-6273(00)80675-3
- 499 Baas PW, Deitch JS, Black MM, Banker GA. 1988. Polarity orientation of microtubules in  
500 hippocampal neurons: uniformity in the axon and nonuniformity in the dendrite. *Proc Natl*  
501 *Acad Sci* **85**:8335–8339. doi:10.1073/pnas.85.21.8335
- 502 Barlan K, Lu W, Gelfand VI. 2013. The Microtubule-Binding Protein Ensconsin Is an Essential  
503 Cofactor of Kinesin-1. *Curr Biol* **23**:317–322. doi:10.1016/j.cub.2013.01.008
- 504 Basant A, Glotzer M. 2018. Spatiotemporal Regulation of RhoA during Cytokinesis. *Curr Biol*  
505 **28**:R570–R580. doi:10.1016/j.cub.2018.03.045
- 506 Basant A, Glotzer M. 2017. A GAP that Divides. *F1000Research* **6**:1788.  
507 doi:10.12688/f1000research.12064.1
- 508 Cornell B, Toyo-oka K. 2017. 14-3-3 Proteins in Brain Development: Neurogenesis, Neuronal  
509 Migration and Neuromorphogenesis. *Front Mol Neurosci* **10**. doi:10.3389/fnmol.2017.00318
- 510 Del Castillo U, Lu W, Winding M, Lakonishok M, Gelfand VI. 2015. Pavarotti/MKLP1 regulates  
511 microtubule sliding and neurite outgrowth in *Drosophila* neurons. *Curr Biol*.  
512 doi:10.1016/j.cub.2014.11.008

- 513 del Castillo U, Winding M, Lu W, Gelfand VI. 2015. Interplay between kinesin-1 and cortical  
514 dynein during axonal outgrowth and microtubule organization in *Drosophila* neurons. *Elife*  
515 **4**:e10140. doi:10.7554/eLife.10140
- 516 Douglas ME, Davies T, Joseph N, Mishima M. 2010. Aurora B and 14-3-3 Coordinately  
517 Regulate Clustering of Centralspindlin during Cytokinesis. *Curr Biol* **20**:927–933.  
518 doi:10.1016/j.cub.2010.03.055
- 519 Emoto K, He Y, Ye B, Grueber WB, Adler PN, Jan LY, Jan Y-N. 2004. Control of Dendritic  
520 Branching and Tiling by the Tricornered-Kinase/Furry Signaling Pathway in *Drosophila*  
521 Sensory Neurons. *Cell* **119**:245–256. doi:10.1016/j.cell.2004.09.036
- 522 Emoto K, Parrish JZ, Jan LY, Jan Y-N. 2006. The tumour suppressor Hippo acts with the NDR  
523 kinases in dendritic tiling and maintenance. *Nature* **443**:210–213. doi:10.1038/nature05090
- 524 Fesquet D, De Bettignies G, Bellis M, Espeut J, Devault A. 2015. Binding of Kif23-iso1/CHO1 to  
525 14-3-3 Is Regulated by Sequential Phosphorylations at Two LATS Kinase Consensus  
526 Sites. *PLoS One* **10**:e0117857. doi:10.1371/journal.pone.0117857
- 527 Gallegos ME, Bargmann CI. 2004. Mechanosensory Neurite Termination and Tiling Depend on  
528 SAX-2 and the SAX-1 Kinase. *Neuron* **44**:239–249. doi:10.1016/j.neuron.2004.09.021
- 529 Goldstein AYN, Jan Y-N, Luo L. 2005. Function and regulation of Tumbleweed (RacGAP50C) in  
530 neuroblast proliferation and neuronal morphogenesis. *Proc Natl Acad Sci U S A* **102**:3834–  
531 9. doi:10.1073/pnas.0500748102
- 532 Guse A, Mishima M, Glotzer M. 2005. Phosphorylation of ZEN-4/MKLP1 by Aurora B Regulates  
533 Completion of Cytokinesis. *Curr Biol* **15**:778–786. doi:10.1016/j.cub.2005.03.041
- 534 He Y, Fang X, Emoto K, Jan Y-N, Adler PN. 2005. The Tricornered Ser/Thr Protein Kinase Is  
535 Regulated by Phosphorylation and Interacts with Furry during *Drosophila* Wing Hair

- 536           Development. *Mol Biol Cell* **16**:689–700. doi:10.1091/mbc.e04-09-0828
- 537   Hergovich A, Stegert MR, Schmitz D, Hemmings BA. 2006. NDR kinases regulate essential cell  
538           processes from yeast to humans. *Nat Rev Mol Cell Biol* **7**:253–264. doi:10.1038/nrm1891
- 539   Hutterer A, Glotzer M, Mishima M. 2009. Clustering of Centralspindlin Is Essential for Its  
540           Accumulation to the Central Spindle and the Midbody. *Curr Biol* **19**:2043–2049.  
541           doi:10.1016/J.CUB.2009.10.050
- 542   Jolly AL, Kim H, Srinivasan D, Lakonishok M, Larson AG, Gelfand VI. 2010. Kinesin-1 heavy  
543           chain mediates microtubule sliding to drive changes in cell shape. *Proc Natl Acad Sci*  
544           **107**:12151–12156. doi:10.1073/pnas.1004736107
- 545   Kapitein LC, Hoogenraad CC. 2015. Building the Neuronal Microtubule Cytoskeleton. *Neuron*  
546           **87**:492–506. doi:10.1016/j.neuron.2015.05.046
- 547   Lin S, Liu M, Mozgova OI, Yu W, Baas PW. 2012. Mitotic Motors Coregulate Microtubule  
548           Patterns in Axons and Dendrites. *J Neurosci* **32**:14033–14049.  
549           doi:10.1523/JNEUROSCI.3070-12.2012
- 550   Lu W, Fox P, Lakonishok M, Davidson MW, Gelfand VI. 2013. Initial neurite outgrowth in  
551           Drosophila neurons is driven by kinesin-powered microtubule sliding. *Curr Biol* **23**:1018–  
552           1023. doi:10.1016/j.cub.2013.04.050
- 553   Lu W, Lakonishok M, Gelfand VI. 2015. Kinesin-1–powered microtubule sliding initiates axonal  
554           regeneration in *Drosophila* cultured neurons. *Mol Biol Cell* **26**:1296–1307.  
555           doi:10.1091/mbc.E14-10-1423
- 556   Lu W, Winding M, Lakonishok M, Wildonger J, Gelfand VI. 2016. Microtubule-microtubule  
557           sliding by kinesin-1 is essential for normal cytoplasmic streaming in *Drosophila* oocytes.  
558           *Proc Natl Acad Sci U S A* **113**:E4995-5004. doi:10.1073/pnas.1522424113

- 559 McLaughlin CN, Nechipurenko I V, Liu N, Broihier HT. 2016. A Toll receptor-FoxO pathway  
560 represses Pavarotti/MKLP1 to promote microtubule dynamics in motoneurons. *J Cell Biol*  
561 **214**:459–74. doi:10.1083/jcb.201601014
- 562 Mishima M, Kaitna S, Glotzer M. 2002. Central spindle assembly and cytokinesis require a  
563 kinesin-like protein/RhoGAP complex with microtubule bundling activity. *Dev Cell* **2**:41–54.
- 564 Okamoto A, Yabuta N, Mukai S, Torigata K, Nojima H. 2015. Phosphorylation of CHO1 by  
565 Lats1/2 regulates the centrosomal activation of LIMK1 during cytokinesis. *Cell Cycle*  
566 **14**:1568–1582. doi:10.1080/15384101.2015.1026489
- 567 Pilling AD, Horiuchi D, Lively CM, Saxton WM. 2006. Kinesin-1 and Dynein Are the Primary  
568 Motors for Fast Transport of Mitochondria in *Drosophila* Motor Axons. *Mol Biol Cell*  
569 **17**:2057–2068. doi:10.1091/mbc.e05-06-0526
- 570 Stone MC, Nguyen MM, Tao J, Allender DL, Rolls MM. 2010. Global Up-Regulation of  
571 Microtubule Dynamics and Polarity Reversal during Regeneration of an Axon from a  
572 Dendrite. *Mol Biol Cell* **21**:767–777. doi:10.1091/mbc.e09-11-0967
- 573 Stone MC, Roegiers F, Rolls MM. 2008. Microtubules Have Opposite Orientation in Axons and  
574 Dendrites of *Drosophila* Neurons. *Mol Biol Cell* **19**:4122–4129. doi:10.1091/mbc.e07-10-  
575 1079
- 576 Tamaskovic R, Bichsel SJ, Hemmings BA. 2003. NDR family of AGC kinases - essential  
577 regulators of the cell cycle and morphogenesis. *FEBS Lett* **546**:73–80. doi:10.1016/S0014-  
578 5793(03)00474-5
- 579 Taya S, Shinoda T, Tsuboi D, Asaki J, Nagai K, Hikita T, Kuroda S, Kuroda K, Shimizu M,  
580 Hirotsune S, Iwamatsu A, Kaibuchi K. 2007. DISC1 regulates the transport of the  
581 NUDEL/LIS1/14-3-3epsilon complex through kinesin-1. *J Neurosci* **27**:15–26.

- 582           doi:10.1523/JNEUROSCI.3826-06.2006
- 583    Ultanir SK, Hertz NT, Li G, Ge W-P, Burlingame AL, Pleasure SJ, Shokat KM, Jan LY, Jan Y-N.  
584           2012. Chemical genetic identification of NDR1/2 kinase substrates AAK1 and Rabin8  
585           Uncovers their roles in dendrite arborization and spine development. *Neuron* **73**:1127–42.  
586           doi:10.1016/j.neuron.2012.01.019
- 587    Verma V, Maresca TJ. 2019. Microtubule plus-ends act as physical signaling hubs to activate  
588           RhoA during cytokinesis. *Elife* **8**. doi:10.7554/eLife.38968
- 589    Winding M, Kelliher MT, Lu W, Wildonger J, Gelfand VI. 2016. Role of kinesin-1–based  
590           microtubule sliding in *Drosophila* nervous system development. *Proc Natl Acad Sci*  
591           **113**:E4985–E4994. doi:10.1073/pnas.1522416113
- 592    Yu W, Cook C, Sauter C, Kuriyama R, Kaplan PL, Baas PW. 2000. Depletion of a microtubule-  
593           associated motor protein induces the loss of dendritic identity. *J Neurosci* **20**:5782–91.  
594           doi:10.1523/JNEUROSCI.20-15-05782.2000
- 595    Zallen JA, Kirch SA, Bargmann CI. 1999. Genes required for axon pathfinding and extension in  
596           the *C. elegans* nerve ring. *Development* **126**:3679–3692.
- 597
